# Supplementary material
Source: PubMed Central journal article supplement (PMC5489959)
Supplement: la7b00527_si_001.pdf [file la7b00527_si_001.pdf]

## Supporting Information

# Buffers strongly modulate fibrin self-assembly into fibrous networks

*Nicholas A. Kurniawan,<sup>†,‡,¶</sup> Thomas H. S. van Kempen,<sup>‡,¶</sup> Stijn Sonneveld,<sup>†</sup> Tilai T. Rosalina,<sup>‡</sup> Bart E. Vos,<sup>†</sup> Karin A. Jansen,<sup>†</sup> Gerrit W. M. Peters,<sup>§</sup> Frans N. van de Vosse,<sup>‡</sup> and Gijsje H. Koenderink<sup>\*†</sup>*

<sup>†</sup>Department of Systems Biophysics, AMOLF, Amsterdam, The Netherlands

<sup>‡</sup>Department of Biomedical Engineering & Institute for Complex Molecular Systems, and

<sup>§</sup>Department of Mechanical Engineering, Eindhoven University of Technology, Eindhoven, The Netherlands

<sup>¶</sup>Authors contributed equally

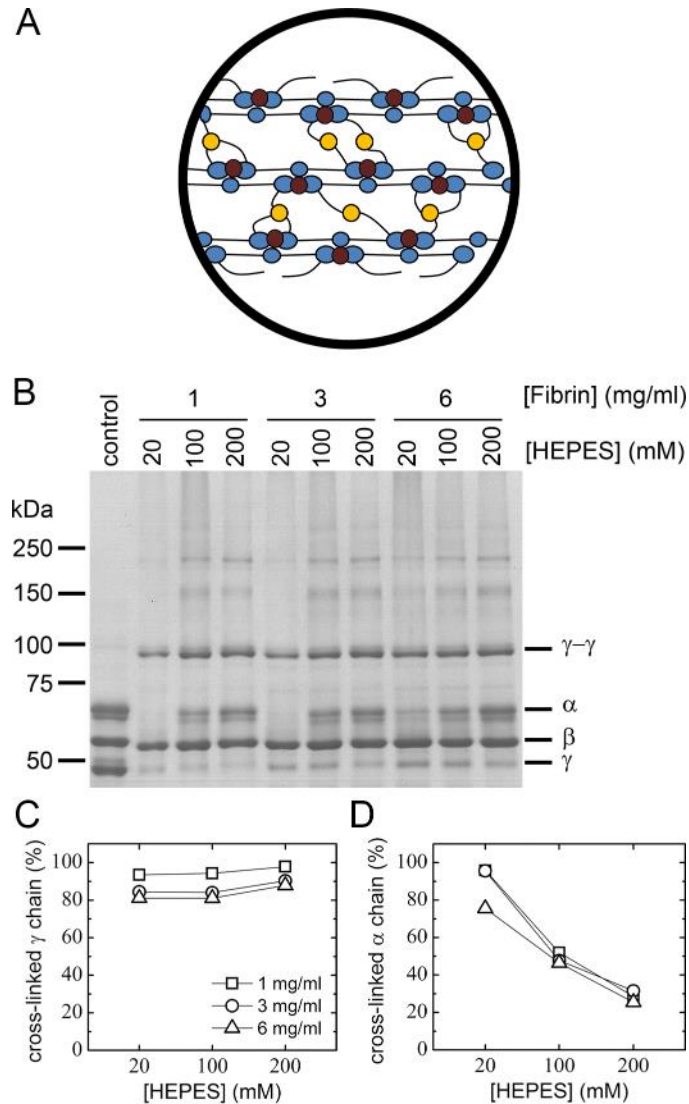

**Figure S1.** Factor XIII-mediated cross-linking of fibrin networks. (A) Schematic picture of part of a bundle of fibrin protofibrils, showing longitudinal  $\gamma$ -chain cross-links within protofibrils (*purple*) and lateral  $\alpha$ -chain cross-links between protofibrils (*yellow*). (B) To confirm cross-linking of the networks due to endogenous Factor XIII, fibrin samples were subjected to SDS-PAGE analysis under reducing conditions. The appearance of high molecular weight bands ( $> 75$  kDa; see marker locations on the left) and the reduction of bands corresponding to uncross-linked  $\alpha$ - and  $\gamma$ -chains (see assignments on the right) confirm the formation of mature clots. The fibrin and HEPES concentrations are indicated. The control sample was a solution of fibrinogen monomer without addition of thrombin. The same amount of protein ( $3 \mu\text{g}$ ) was loaded on all lanes. Densitometry analysis was performed to

quantify the fractions of cross-linked (C)  $\gamma$ -chains (within protofibrils) and (D)  $\alpha$ -chains (between protofibrils).

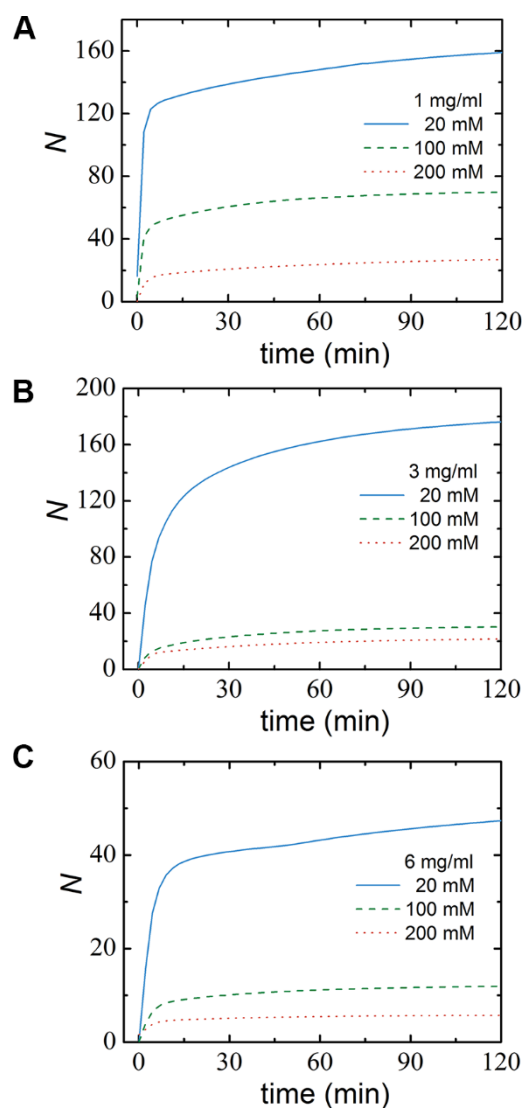

**Figure S2.** Turbidity measurements of the time course of protofibril lateral association in fibrin clots polymerizing at varying fibrin and HEPES concentrations. The growth of the average number of protofibrils per fiber cross-section,  $N$ , as the clots form was measured by analyzing the wavelength dependence of the solution turbidity and is plotted at (A) 1 mg/ml, (B) 3 mg/ml, and (C) 6 mg/ml fibrin concentrations, at 20 (*solid lines*), 100 (*dashed lines*), and 200 mM HEPES (*dotted lines*). Note that this time-resolved analysis assumes that all

fibrin monomers have been incorporated into the fibers 2.5 min after the initiation of polymerization.<sup>1-2</sup> Model-based interpretation of light-scattering data estimated that >70% of the monomers are already incorporated in the first 2 min,<sup>3</sup> suggesting that this assumption is a reasonable first approximation.

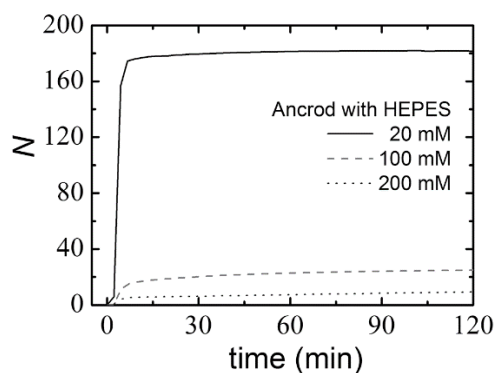

**Figure S3.** Turbidimetry analysis of ancrod-catalyzed fibrin polymerization at a fibrin concentration of 3 mg/ml with different HEPES concentrations. The evolution of  $N$ , the average number of protofibrils per fiber, is plotted as a function of time after addition of 0.5 NIH U/ml ancrod.

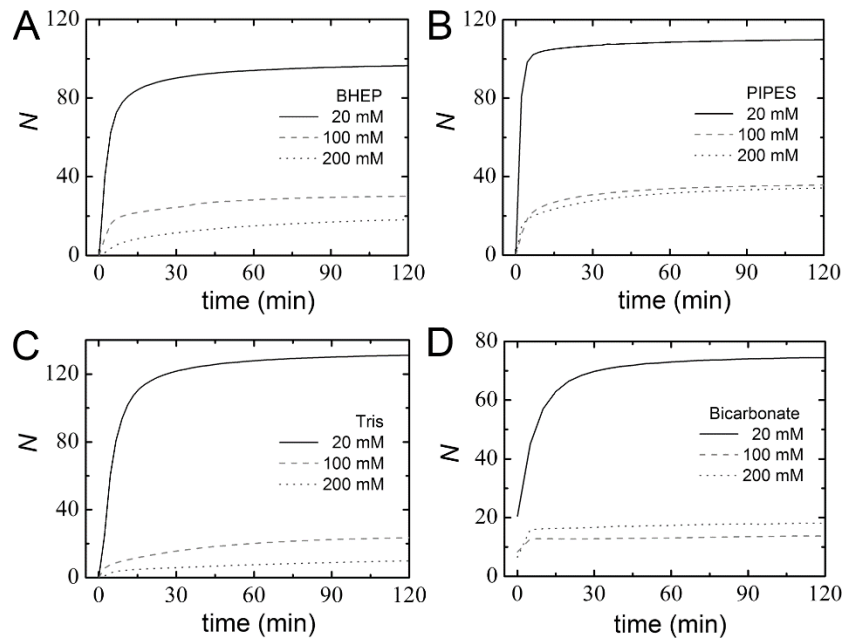

**Figure S4.** Turbidimetry analysis of fibrin polymerizing in various buffers. The evolution of  $N$  in 3 mg/ml fibrin clots formed by addition of 0.5 U/ml thrombin is evaluated at 20, 100, or 200 mM final buffer concentrations for (A) BHEP, (B) PIPES, (C) Tris, and (D) bicarbonate.

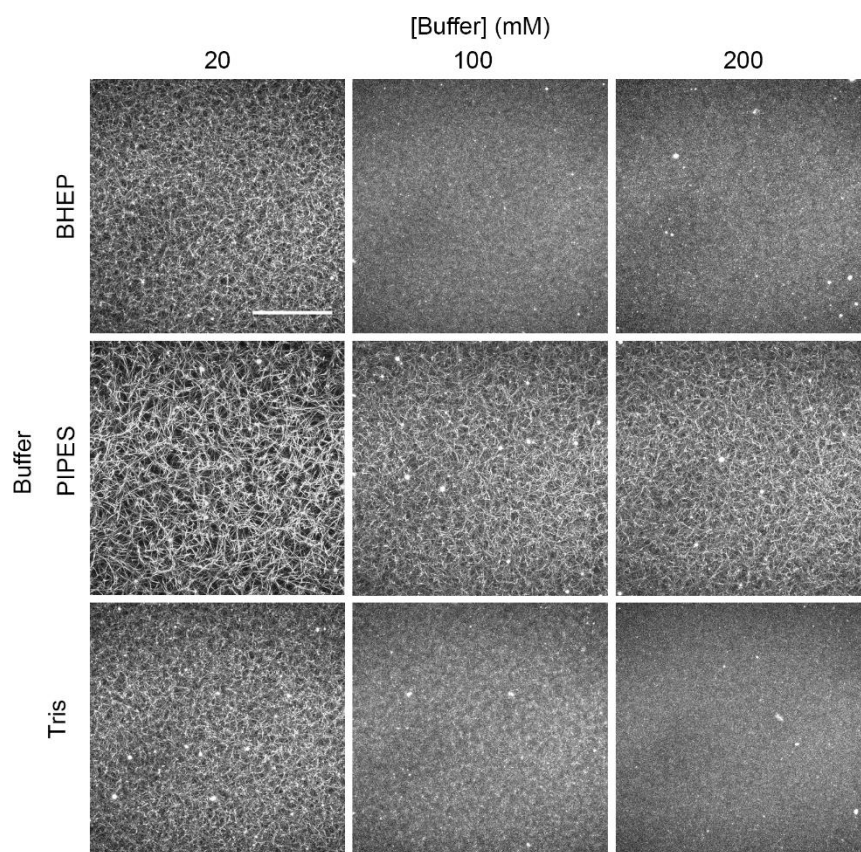

**Figure S5.** Confocal fluorescence images of 3 mg/ml fibrin networks formed with 20 mM, 100 mM, and 200 mM BHEP, PIPES, or Tris concentrations. Images are maximum intensity projections from z-stacks of 20  $\mu\text{m}$  with 0.5  $\mu\text{m}$  interval. Scale bar, 10  $\mu\text{m}$ .

**Table S1.** Summary of reported effects of additives on fibrin structure

| Type               | Compound                                             | Observed effect                                                                   | Assembly condition                                                                      | Proposed mechanism                                        | Reference                           |
|--------------------|------------------------------------------------------|-----------------------------------------------------------------------------------|-----------------------------------------------------------------------------------------|-----------------------------------------------------------|-------------------------------------|
| pH                 |                                                      | pH ↑ → clotting time, opacity ↓                                                   | 50 mM phosphate buffer, pH 6.3–7.4, ionic strength 0.3                                  | Possible charge effect                                    | Ferry & Morrison <sup>4</sup>       |
| ion/ionic strength | Ca <sup>2+</sup>                                     | [Ca <sup>2+</sup> ] ↑ → clotting time ↓, no effect on FpA and FpB release         | Tris-imidazole buffer, ionic strength 0.18–0.24                                         | Direct binding to fibrin(ogen)                            | Okada & Blömbäck <sup>5</sup>       |
|                    | F <sup>-</sup>                                       | [F <sup>-</sup> ] ↑ → no change                                                   | ~20 mM CHES-Tris-BisTris buffer, ionic strength 0.2                                     | Affinity with water molecules                             | Di Stasio et al <sup>6</sup>        |
|                    | Cl <sup>-</sup>                                      | [Cl <sup>-</sup> ] ↑ → turbidity, fiber diameter ↓                                | ~20 mM CHES-Tris-BisTris buffer, ionic strength 0.2                                     | Affinity with protein                                     | Di Stasio et al <sup>6</sup>        |
|                    | NaCl                                                 | ionic strength (via NaCl) ↑ → opacity goes through a minimum                      | 50 mM phosphate buffer, ionic strength 0.15–1.5                                         | Possible charge effect                                    | Ferry & Morrison <sup>4</sup>       |
|                    | NaCl                                                 | ionic strength (via NaCl) ↑ → turbidity ↓                                         | 50 mM Tris buffer, ionic strength 0.09–1.5, with 1 U/ml thrombin or 0.25 g/ml reptilase | Ca <sup>2+</sup> -mediated fibrin assembly                | Carr et al <sup>7</sup>             |
|                    | NaCl                                                 | [NaCl] ↑ → turbidity ↓                                                            | 20 mM phosphate buffer, pH 7.4                                                          | Kinetically-determined clot structure                     | Weisel & Nagaswami <sup>8</sup>     |
| enzyme             | thrombin                                             | [thrombin] ↑ → clotting time ↓                                                    | Ionic strength 0.3, pH 6.64–6.81                                                        | -                                                         | Ferry & Morrison <sup>4</sup>       |
|                    |                                                      | [thrombin] ↑ → clotting time ↓                                                    | 20 mM phosphate buffer, pH 7.4                                                          | Kinetically-determined clot structure                     | Weisel & Nagaswami <sup>8</sup>     |
|                    |                                                      | [thrombin] ↑ → fiber diameter, protofibril packing ↓                              | 50 mM Tris buffer, pH 7.4                                                               | -                                                         | Domingues et al <sup>9</sup>        |
| protein            | fibronectin                                          | [fibronectin] ↑ → turbidity ↑                                                     | 40 mM Tris-imidazole buffer, ionic strength 0.15                                        | Fibronectin acts as bridge between fibrin strands         | Okada et al <sup>10</sup>           |
|                    |                                                      | [fibronectin] ↑ → turbidity ↑, fiber diameter ↓                                   | 50 mM Tris buffer                                                                       | -                                                         | Ramanathan and Karuri <sup>11</sup> |
|                    | decorin                                              | [decorin] ↑ → turbidity, fiber diameter ↓                                         | 20 mM HEPES buffer                                                                      | Steric hindrance due to bound decorin                     | Dugan et al <sup>12</sup>           |
|                    | heparin                                              | [heparin] ↑ → fiber protein content ↓                                             | 20 mM HEPES buffer, pH 7.4                                                              | Ternary interaction between fibrin, heparin, and thrombin | Yeromonahos et al <sup>13</sup>     |
| cosolvent          | glycerol, glucose, propylene glycol, ethylene glycol | [reagent] ↑ → opacity ↓                                                           | pH 6.3, ionic strength 0.15                                                             | Unknown specific interaction with fibrinogen              | Ferry & Morrison <sup>4</sup>       |
|                    | starch                                               | [starch] ↑ → opacity ↑                                                            | pH 6.3–6.7, ionic strength 0.15                                                         | Aggregation of fibrinogen                                 | Carr <sup>14</sup>                  |
|                    | dextran                                              | [dextran] ↑ → polymerization rate, turbidity, fiber mass-length ratio ↑           | 50 mM Tris buffer, pH 7.4                                                               | Dextran incorporation into fibrin fibers                  | Carr & Gabriel <sup>15</sup>        |
|                    | polyphosphate                                        | [polyphosphate] ↑ → turbidity, fiber diameter, mass-length ratio ↑                | 50 mM Tris buffer, pH 7.4                                                               | -                                                         | Smith & Morrissey <sup>16</sup>     |
| buffer             | HEPES, Tris, PIPES, BHEP                             | [buffer] ↑ → turbidity, fiber diameter, mass-length ratio, protofibril bundling ↓ | 20–200 mM buffer, pH 7.4, with 0.5 U/ml thrombin or anrod                               | Slow down of protofibril lateral association              | <i>this work</i>                    |

**Table S2.** Conductivity and viscosity of aqueous solutions of HEPES buffer at different concentrations, but constant pH (7.4) and ionic strength (150 mM NaCl, 5 mM CaCl<sub>2</sub>).

| [HEPES]<br>mM | Conductivity<br>mS/cm | Viscosity<br>mPa.s |
|---------------|-----------------------|--------------------|
| 20            | 15.7                  | 0.71               |
| 100           | 16.2                  | 0.75               |
| 200           | 16.5                  | 0.78               |

## References

1. Kurniawan, N. A.; Grimbergen, J.; Koopman, J.; Koenderink, G. H. Factor XIII stiffens fibrin clots by causing fiber compaction. *J. Thromb. Haemost.* **2014**, *12* (10), 1687-1696.
2. van Kempen, T. H.; Bogaerds, A. C.; Peters, G. W.; van de Vosse, F. N. A constitutive model for a maturing fibrin network. *Biophys. J.* **2014**, *107* (2), 504-513.
3. Ferri, F.; Greco, M.; Arcovito, G.; Bassi, F. A.; De Spirito, M.; Paganini, E.; Rocco, M. Growth kinetics and structure of fibrin gels. *Phys. Rev. E* **2001**, *63* (3 Pt 1), 031401.
4. Ferry, J. D.; Morrison, P. R. Preparation and properties of serum and plasma proteins. VIII. The conversion of human fibrinogen to fibrin under various conditions. *J. Am. Chem. Soc.* **1947**, *69* (2), 388-400.
5. Okada, M.; Blomback, B. Calcium and fibrin gel structure. *Thromb. Res.* **1983**, *29* (3), 269-280.
6. Di Stasio, E.; Nagaswami, C.; Weisel, J. W.; Di Cera, E. Cl<sup>-</sup> regulates the structure of the fibrin clot. *Biophys. J.* **1998**, *75* (4), 1973-1979.
7. Carr, M. E., Jr.; Gabriel, D. A.; McDonagh, J. Influence of Ca<sup>2+</sup> on the structure of reptilase-derived and thrombin-derived fibrin gels. *Biochem. J.* **1986**, *239* (3), 513-516.



8. Weisel, J. W.; Nagaswami, C. Computer modeling of fibrin polymerization kinetics correlated with electron microscope and turbidity observations: clot structure and assembly are kinetically controlled. *Biophys. J.* **1992**, *63* (1), 111-128.
9. Domingues, M. M.; Macrae, F. L.; Duval, C.; McPherson, H. R.; Bridge, K. I.; Ajjan, R. A.; Ridger, V. C.; Connell, S. D.; Philippou, H.; Ariëns, R. A. Thrombin and fibrinogen gamma' impact clot structure by marked effects on intrafibrillar structure and protofibril packing. *Blood* **2016**, *127* (4), 487-495.
10. Okada, M.; Blömbäck, B.; Chang, M.-D.; Horowitz, B. Fibronectin and fibrin gel structure. *J. Biol. Chem.* **1985**, *260* (3), 1811-1820.
11. Ramanathan, A.; Karuri, N. Fibronectin alters the rate of formation and structure of the fibrin matrix. *Biochem. Biophys. Res. Commun.* **2014**, *443* (2), 395-399.
12. Dugan, T. A.; Yang, V. W. C.; McQuillan, D. J.; Hook, M. Decorin modulates fibrin assembly and structure. *J. Biol. Chem.* **2006**, *281* (50), 38208-38216.
13. Yeromonahos, C.; Marlu, R.; Polack, B.; Caton, F. Antithrombin-independent effects of heparins on fibrin clot nanostructure. *Arterioscler. Thromb. Vasc. Biol.* **2012**, *32* (5), 1320-4.
14. Carr, M. E. Effect of hydroxyethyl starch on the structure of thrombin-induced and reptilase-induced fibrin gels. *J. Lab. Clin. Med.* **1986**, *108* (6), 556-561.
15. Carr, M. E.; Gabriel, D. A. Dextran-induced changes in fibrin fiber size and density based on wavelength dependence of gel turbidity. *Macromolecules* **1980**, *13* (6), 1473-1477.
16. Smith, S. A.; Morrissey, J. H. Polyphosphate enhances fibrin clot structure. *Blood* **2008**, *112* (7), 2810-2816.
